# Supplementary material
Source: PubMed Central journal article supplement (PMC2667993)
Supplement: mmc1.pdf [file mmc1.pdf]

## Supplemental Data

### Ciliary Abnormalities Due to Defects

### in the Retrograde Transport Protein DYNC2H1

### in Short-Rib Polydactyly Syndrome

Amy E. Merrill, Barry Merriman, Claire Farrington-Rock, Natalia Camacho, Eiman T. Sebald, Vincent A. Funari, Matthew J. Schibler, Marc H. Firestein, Zachary A. Cohn, Mary Ann Priore, Alicia K. Thompson, David L. Rimoin, Stanley F. Nelson, Daniel H. Cohn, and Deborah Krakow

**Table S1. Oligonucleotide sequences for PCR of DYNC2H1**

| DYNC2H1 Fragment | 5' Forward Primer           | 3' Reverse Primer           |
|------------------|-----------------------------|-----------------------------|
| Exon 1           | CAAAGCTCCTCTCTTCCCTTCACTTC  | TCCTGAAAAGGATCTGGTTGGTAAAG  |
| Exon 2           | AAGGAAAGAAGAGATAAATTGGTTTT  | TGCATTTTATACCTTTCTCCAATTC   |
| Exon 3           | TGTTTTGGGAAGCCAATTTGATTAG   | CCTATGCTCAGAGAAATTCCAAAAG   |
| Exon 4           | TGACTCAAATATTTTGCTGCTCTGC   | AGGCTGTAAAAATTGAATCCCAAAG   |
| Exon 5           | GGCAATATTAGAGTTGTGGCAGTTG   | TGCTACATGATTTGCTTTAAGAGTTAC |
| Exon 6           | CATGCATGTGGTATTTCATAGATCC   | TCTCACAAAATAATTTCCAGCAGATG  |
| Exon 7/8         | TTTAGACCTATTTATGCAAATGGTTGG | CTTTGCTTATAGTTGGACGCTTTACC  |
| Exon 9           | TCAGAAATTCAGACAGTCCACAGC    | TCAGCATGAAAATGTCAGAAAAATG   |
| Exon 10          | TGACATAGTGCTTGGTACGTGGAAG   | GACAGACATGCCAAGGAAAACAGAG   |
| Exon 11          | GAATCACAGATCAGAGAAGGGGACTC  | GGAGGAGTAGCAAGTTTGGAGAAAAGG |
| Exon 12          | ATTGTGTTTATTAGTCAAACAGTGAG  | CAGCTGGCAGTGCTATTCTATGAGC   |
| Exon 13          | AATGCCCTATTGGAGATGAAAAACC   | AAGTCCCTGGAAGCAAACAAAATC    |
| Exon 14          | GCAGGTCAGAGTTGGGGATAGTTG    | GCAAATGGGAATTGTGATTTCTCTG   |
| Exon 15          | GGTGGTATCTGTCAGGTTTCTCCAC   | TGTAAATTGATTGTTTCATATGTGGTC |
| Exon 16/17       | TTAAATGAAAAATCCATTCTACTGC   | TCTACGAATCCAGCTCTCTGCTTTG   |
| Exon 18          | TTTCTGTTTATTCTTTAGGCTGTGC   | CAAGAAGCTGATGTGACTTCAATGC   |
| Exon 19          | TGTGCTTAAAGATCACCATATTACTGC | AATGATTGAATATGGACTTTTCCTG   |
| Exon 20          | TGTAAGTACTTCTACCACCCCTTG    | TTACCTAATTTAAACATTTTCCATGC  |
| Exon 21          | AACAACTGTTTAAATGCAAAAATC    | AAACCTGGGCTATAAAGGAATAAAAG  |
| Exon 22          | GAAAGAAAAGTATGAACCCAAAATG   | AAAAGTGATGAAGTTTATGAGGAAAG  |
| Exon 23/24       | CACACATACAAGGATTGCAGTTAAG   | CATAAGATGAAAGCTCCAAACATTG   |
| Exon 25          | TGTGTGTCATGGCAACATTTAATC    | TTTACTTTTTGATGAAAGCTGATTCC  |
| Exon 26          | TTTTGCCTTATGGTGAAAAGC       | GTAATTTGCCTGTATTAAGCACTTC   |
| Exon 27/28       | GGTGCCTGTATTCCCAGCTACTTG    | TCTTTGGGTACAGGAACTGTATTTGG  |
| Exon 29          | TTTCCCTCAATAGGACATTTAAACAC  | AACCAACTTTACCCTCTAAATTGAC   |
| Exon 30          | CCCCGTCTTGAAATAACAGTATAGAG  | TTATCTGAGCCTCCTGGCTTCTAGG   |
| Exon 31          | GGTTCAGTATGACATTAAGATGGAG   | TTCCTCGAGTAATCACCAACACAG    |
| Exon 32          | CCATTTAAATTCATGGAGAAATCAC   | TTCTTATGTGACACCTTTCTAATTCTG |
| Exon 33          | TTTAACTGTTTGTTCATTTTTATC    | ACAACCTCTGTCCATTTTACATTC    |

|         |                              |                              |
|---------|------------------------------|------------------------------|
| Exon 34 | TTGAAATCAACCTGGGTTTTGAAAG    | CAGATTAGAAACACGGATGTCAGGAG   |
| Exon 35 | TGTTGGCAGCATATTTTATGTTTATAG  | ATGTGCATGCTAAAGCCTTTCATAG    |
| Exon 36 | ATGATTATTTTGTGTGGTTGCTTCC    | AATTGGGGCAGGGTATACAGTAATC    |
| Exon 37 | AGTAAGCTTGCCAATTCATGTGATG    | GAAGACTTCCCTGAGCAAGTGAG      |
| Exon 38 | GGCAATACCTTCCACTGAAGAAATC    | TGGTCATGTAGAAGTCTTGACAAAG    |
| Exon 39 | GATTGCGCATGGGTTCTTCAG        | TTTTACTTAATATGAAACCAGGACAG   |
| Exon 40 | TGTGCGTAGAATAATGTTTATTGGAG   | AGCAGTGACAAAATCCACCTCTCAC    |
| Exon 41 | TGAGTTTAAAAATGGTTCTTGAAAAGG  | CAAATCATTGTGTTTTGGCAGTTAAG   |
| Exon 42 | TTGGAACTAAGATGATTACTTTTTGG   | ACAAAAGCCATTAAATCAATTAGGG    |
| Exon 43 | GAGTATAAAATGTATTTTGTGGTTGC   | CCAAATGAAGAATGAATATTTTCTAAG  |
| Exon 44 | TGAAACTTAGGCAAAAATATCCTTTATC | ATTGCCTATATTTTGAGAAGGGTAGG   |
| Exon 45 | TAGAGCAGCACAGTTTCAAACCAC     | AACAGGAAAGTAAAGCCTGGGTGTC    |
| Exon 46 | CAGTTCATCTACAGGTAGAAATTGG    | TGACAATCATACACAGTTTGGAAAGAAG |
| Exon 47 | TTCCTTCTTCCATTTATCTGATGC     | GACCTATAAAATCATGCTCTGGGTAAG  |
| Exon 48 | TTCTGGAGATGATCTTATTTGGATT    | AAGATAAGAACCAGCTTTCCTATT     |
| Exon 49 | GCCAATATATTTATCCAGGATTACC    | AAACCAAATAAAGCAAAAGAGAGTG    |
| Exon 50 | CCAAATTATGTGGCTAAAGTTTGAT    | AAAAATGGAGTCTCTCAATTCTCCT    |
| Exon 51 | GGTGTTTGAATTTTATCAAATGAGG    | GGTGTTACTTTCTAAAAGCTCCAGA    |
| Exon 52 | ATTGTGCTCGTTTTAAGAAACAAC     | GAAGAAAACAGACATTTCCAAACAT    |
| Exon 53 | TGTCTCTTAGTCTGGAATGAATCCT    | TTTGCATCAGAAGAAATCTAATTTTG   |
| Exon 54 | GGAGCTGTGAATAGTTGTCTAGGAA    | AAACCTACAGGGCAATATAGGTAGG    |
| Exon 55 | CACACTTAACATGTTTGCTTGATTC    | AATATAGGAAAATACCATGCCCTTC    |
| Exon 56 | TGGAAACTCTCTTGTGCATAGATTCA   | GGCTTTCCTTCTTGTCTCTTTTAC     |
| Exon 57 | ACCTTGATGATTGAAAGCATTTTG     | ATGAAGTGCATTTTGAAAAACAATA    |
| Exon 58 | TGGATTAAGTATTGCATACACCA      | TAATGCTTCCAAGTGAATTCCTA      |
| Exon 59 | GTGCCCAAATAAAGTGTGTAAGAAT    | CAACTGCCATTTTACAAATAGAGAAA   |
| Exon 60 | CTTCTAATTTTAGCGTTGCTTTTCA    | CACAGCATCATCTGACATAAGAGTC    |
| Exon 61 | GTGTGTGTGGGTTTGTCTCTTCTAT    | GCAAATTAATGGATCTTCTCTCCT     |
| Exon 62 | CAGCAGAGTCTGAGATCTTTTGTAT    | GGTATCCTTGAACCCATATAAAAT     |
| Exon 63 | GAAGAATGGGTTTCAAGTAAGGACT    | CTAACTGAATCATTGATGGGTTTTTC   |
| Exon 64 | TCTGGAGACGTAAAATAAGATGACA    | TGTACTACTCGAAGCACAATGATGT    |
| Exon 65 | CATGGTTGTATATTTGTGTTCTCCA    | CAGTAGGACCCAGTGTTGAATCTAT    |
| Exon 66 | TCTGAACATAAGCAGAGTAGGGTTC    | ACACATATTGCTGAAGGAAGTAAGC    |
| Exon 67 | TATCTCAGGTAACCCAACCTTTTGC    | ATAAAGCTCGAAAAGATTCCAAGG     |
| Exon 68 | TCATCAGATGTAATTGTTGAAGGTG    | ACATAGCTCCCCTTCTTGTTAGAAT    |
| Exon 69 | AAGTTGCCATAAACATCAAATGAAT    | AACTAGAATCAAACCCAATGTTCTG    |
| Exon 70 | CATCATCTTCATTTGTTTTATGTGC    | TTACATGTGGTCTTTTGAACATAA     |
| Exon 71 | TAGTCCCTTGAATTTGATGGTTAAA    | AATGCTATAAGGCATTCCAGTTAAA    |
| Exon 72 | TTAACGACTATGCTTTTCAAAGAC     | CACAGGGAAGTAGAACTAGGAATCA    |
| Exon 73 | GAAGAAGTGGTAAGATGGAAATGAG    | GAACACCTCTGAAGCAAATTATACC    |
| Exon 74 | AGAATTTTACCATGGTGACTTGTA     | AACACTGATTACGAATAAGGAGCAC    |
| Exon 75 | ACAAGGCAACACAAAGTAGAAGAGT    | ATTTAATTGTCAATAAGGTGGCAA     |
| Exon 76 | CCTATTGTGACAGTTTAAAGCACAG    | GCCGAGAATTATTTTCTAAAACAG     |
| Exon 77 | TGAGATTACAACCTCACCTGGGTATT   | CCATGGAAAATAACATATCCACAGT    |
| Exon 78 | CCAGTTAGGAAGGTTTAGGGATTAC    | AATGCATGACATTTAATACTGATGT    |
| Exon 79 | CCAGAGCATTAAAGAAATACATCAGAA  | TGTA AAAAGAAGTTGTGTGTTCTGT   |
| Exon 80 | TAATTTAACTCAAACCCGTAAGC      | ATTTTTAGTAGAGATGGGGTTTCC     |
| Exon 81 | TACTTTTCATGCTATGGCCAGTTA     | CAAGCAAATTTTGTGATAGGAAGTT    |

|         |                             |                            |
|---------|-----------------------------|----------------------------|
| Exon 82 | AAATATAACTCAAGGCAGGAATTTAG  | GCCTCACTAAAGTTGAAAGAATCAA  |
| Exon 83 | TTAATGACAGAATACTTCCCACAGA   | TAAATAAAGCTTGTGGGGTCTACAG  |
| Exon 84 | GGCTGAAGTTCTTTTTATTTGTTGA   | CATGACTTCACAGTTAGGAACCTCT  |
| Exon 85 | GCTGACTTAATACATTTGACCGTTT   | TTGGATTCTTCAGTTACATCAGTCA  |
| Exon 86 | TCATGCTGTCTCTACTGTTCAATTT   | CAAAAATAACAAATGGCAGAATAATG |
| Exon 87 | TTCTAGCTACCATTTTCAGAGCATTT  | AATCAAGGGCAGTGTAATAGGAAGT  |
| Exon 88 | GCTTTGAAAATTTAGTGTGAACCTCTG | GTTGTTTCATGCCAAATCTTATTTT  |
| Exon 89 | TGGAAAGCATAGCTCTTAAGGTAGA   | GGTGAGATTAGAAAGCAAACAAAAA  |
| Exon 90 | ATAGGCCATGTGTTTCATTTTGTT    | AAATGTAGACTGACCACATGTTTGA  |
